# Supplementary material for: Prdm6 drives ductus arteriosus closure by promoting ductus arteriosus smooth muscle cell identity and contractility
Source: JCI Insight. 2023 Mar 8;8(5):e163454. doi: 10.1172/jci.insight.163454 (PMC10077476; doi:10.1172/jci.insight.163454)
Supplement: Supplemental data [file jciinsight-8-163454-s069.pdf]

**Supplemental Table I. MRTF-A binding partners in mouse SMC.** Endogenous MRTF-A was immunoprecipitated from mouse AoSMC lysates, and binding partners were identified by LS/MS/MS analysis.

| Uniprot Accession | Name                                                                                    | Abbreviation |
|-------------------|-----------------------------------------------------------------------------------------|--------------|
| Q5SWU9            | acetyl-Coenzyme A carboxylase alpha                                                     | Acaca        |
| Q07417            | acyl-Coenzyme A dehydrogenase, short chain                                              | Acads        |
| Q8K3H0            | adaptor protein, phosphotyrosine interaction, PH domain and leucine zipper containing 1 | Appl1        |
| A2AE38            | adhesion molecule with Ig like domain 1                                                 | Amigo1       |
| O89020            | afamin                                                                                  | Afm          |
| P24549            | aldehyde dehydrogenase family 1, subfamily A                                            | Aldh1a1      |
| A6ZI44            | aldolase A, fructose-bisphosphate                                                       | Aldoa        |
| D3YW52            | alpha-2-macroglobulin                                                                   | A2m          |
| F8VFN4            | amylase-1,6-glucosidase, 4-alpha-glucanotransferase                                     | Agl          |
| E9Q414            | apolipoprotein B                                                                        | Apob         |
| P48999            | arachidonate 5-lipoxygenase                                                             | Alox5        |
| P61164            | ARP1 actin-related protein 1A, centractin alpha                                         | Actr1a       |
| P41233            | ATP-binding cassette, sub-family A (ABC1), member 1                                     | Abca1        |
| Q8K440            | ATP-binding cassette, sub-family A (ABC1), member 8b                                    | Abca8b       |
| Q9JJ59            | ATP-binding cassette, sub-family B (MDR/TAP), member 9                                  | Abcb9        |
| Q9WU60            | atractin                                                                                | Atrn         |
| Q9JLV1            | BCL2-associated athanogene 3                                                            | Bag3         |
| P59017            | BCL2-like 13 (apoptosis facilitator)                                                    | Bcl2l13      |
| Q8CI94            | brain glycogen phosphorylase                                                            | Pygb         |
| Q6GQW0            | BTB (POZ) domain containing 11                                                          | Btbd11       |
| A0PKJ7            | cadherin-related family member 5                                                        | Cdhr5        |
| Q92379            | calcium/calmodulin-dependent protein kinase II gamma                                    | Camk2g       |
| A0A0G2JGS4        | calcium/calmodulin-dependent protein kinase II, delta                                   | Camk2d       |
| O88456            | calpain, small subunit 1                                                                | Capns1       |
| Q08093            | calponin 2                                                                              | Cnn2         |
| P47936            | cannabinoid receptor 2 (macrophage)                                                     | Cnr2         |
| B2RS76            | carboxypeptidase B1 (tissue)                                                            | Cpb1         |
| Q60737            | casein kinase 2, alpha 1 polypeptide                                                    | Csnk2a1      |
| Q549Q4            | CD2 antigen                                                                             | Cd2          |
| Q3TI84            | CDC16 cell division cycle 16                                                            | Cdc16        |
| E9PVY0            | CDC42 binding protein kinase alpha                                                      | Cdc42bpa     |
| Q7TT50            | CDC42 binding protein kinase beta                                                       | Cdc42bpb     |
| Q6NV72            | cDNA sequence BC068281                                                                  | BC068281     |
| Q8CH18            | cell division cycle and apoptosis regulator 1                                           | Ccar1        |
| Q6A065            | centrosomal protein 170                                                                 | Cep170       |
| Q99LI7            | cleavage stimulation factor, 3' pre-RNA, subunit 3                                      | Cstf3        |
| D3YUP1            | coactivator-associated arginine methyltransferase 1                                     | Carm1        |
| Q02788            | collagen, type VI, alpha 2                                                              | Col6a2       |
| P01027            | complement component 3                                                                  | C3           |
| P01029            | complement component 4B (Chido blood group)                                             | C4b          |
| A2A432            | cullin 4B                                                                               | Cul4b        |
| Q8CID0            | cysteine and glycine-rich protein 2 binding protein                                     | Csrp2bp      |
| Q7TMB8            | cytoplasmic FMR1 interacting protein 1                                                  | Cyflp1       |
| K3W4R0            | dynein, axonemal, heavy chain 17                                                        | Dnah17       |
| L7N1Y0            | dynein, axonemal, heavy chain 7B                                                        | Dnah7b       |
| B2RWS6            | E1A binding protein p300                                                                | Ep300        |
| Q8BL66            | early endosome antigen 1                                                                | Eea1         |
| Q05BC3            | echinoderm microtubule associated protein like 1                                        | Eml1         |
| F8WJ93            | echinoderm microtubule associated protein like 4                                        | Eml4         |
| E9QAU4            | enhancer trap locus 4                                                                   | Et14         |
| Q8BH95            | enoyl Coenzyme A hydratase, short chain, 1, mitochondrial                               | Echs1        |
| Q8BGS1            | erythrocyte membrane protein band 4.1 like 5                                            | Epb41l5      |
| Q3ULL5            | eukaryotic translation initiation factor 2, subunit 2 (beta)                            | Eif2s2       |
| Q3UW53            | family with sequence similarity 129, member A                                           | Fam129a      |
| Q3UW64            | glucosamine (UDP-N-acetyl)-2-epimerase/N-acetylmannosamine kinase                       | Gne          |
| Q9CQZ1            | heat shock factor binding protein 1                                                     | Hsbp1        |
| Q9JK92            | heat shock protein 8                                                                    | Hspb8        |
| P01942            | hemoglobin alpha, adult chain 1                                                         | Hba-a1       |
| Q3UDW8            | heparan-alpha-glucosaminide N-acetyltransferase                                         | Hgsnat       |
| Q20BD0            | heterogeneous nuclear ribonucleoprotein A/B                                             | Hnmpab       |
| Q8VDM6            | heterogeneous nuclear ribonucleoprotein U-like 1                                        | Hnmpu1       |
| Q9JIY5            | HtrA serine peptidase 2                                                                 | Htra2        |
| O88703            | hyperpolarization-activated, cyclic nucleotide-gated K+ 2                               | Hcn2         |
| P01751            | immunoglobulin heavy variable 1-72                                                      | Ighv1-72     |
| A0A075B666        | immunoglobulin kappa chain variable 13-85                                               | Igkv13-85    |
| Q91YE6            | importin 9                                                                              | Ipo9         |
| D3Z627            | integrin alpha L                                                                        | Itgal        |
| Q9QXH4            | integrin alpha X                                                                        | Itgax        |
| E9QAD8            | IQ motif and Sec7 domain 2                                                              | Iqsec2       |
| E9Q9B7            | kinase D-interacting substrate 220                                                      | Kidins220    |
| E9Q0J5            | kinesin family member 21A                                                               | Kif21a       |
| B7ZNG0            | kinesin family member 7                                                                 | Kif7         |
| Q91W40            | kinesin light chain 3                                                                   | Klc3         |

## Supplemental Table I. (continued)

|            |                                                                                                                          |               |
|------------|--------------------------------------------------------------------------------------------------------------------------|---------------|
| B2RWI2     | lactamase, beta                                                                                                          | Lactb         |
| Q8R502     | leucine rich repeat containing 8 family, member C                                                                        | Lrrc8c        |
| Q8CGK3     | ion peptidase 1, mitochondrial                                                                                           | Lorp1         |
| V9GX48     | M-phase phosphoprotein 9                                                                                                 | Mphosph9      |
| Q9EQQ9     | meningioma expressed antigen 5 (hyaluronidase)                                                                           | Mgea5         |
| P25206     | minichromosome maintenance complex component 3                                                                           | Mcm3          |
| Q52KC3     | minichromosome maintenance complex component 5                                                                           | Mcm5          |
| Q80X85     | mitochondrial ribosomal protein S7                                                                                       | Mps7          |
| Q8K4J6     | MKL (megakaryoblastic leukemia)/myocardin-like 1                                                                         | Mkl1          |
| Q3U2W2     | MYB binding protein (P160) 1a                                                                                            | Mybbp1a       |
| Q80TM9     | nischarin                                                                                                                | Nisch         |
| Q99K48     | non-POU-domain-containing, octamer binding protein                                                                       | Nono          |
| Q60632     | nuclear receptor subfamily 2, group F, member 1                                                                          | Nr2f1         |
| Q9CQF3     | nudix (nucleoside diphosphate linked moiety X)-type motif 21                                                             | Nudt21        |
| Q8CGY8     | O-linked N-acetylglucosamine (GlcNAc) transferase (UDP-N-acetylglucosamine:polypeptide-N-acetylglucosaminyl transferase) | Ogt           |
| Q8VGB4     | olfactory receptor 985                                                                                                   | Olfir985      |
| A2AEG2     | oral-facial-digital syndrome 1 gene homolog (human)                                                                      | Ofd1          |
| B2RRE7     | OTU domain containing 4                                                                                                  | Otd4          |
| A0A0G2JDJ3 | paired immunoglobulin-like type 2 receptor alpha                                                                         | Pilra         |
| Q9R0L6     | pericentriolar material 1                                                                                                | Pcm1          |
| Q8BVZ1     | perilipin 5                                                                                                              | Plin5         |
| Q8BH04     | phosphoenolpyruvate carboxykinase 2 (mitochondrial)                                                                      | Pck2          |
| Q64737     | phosphoribosylglycinamide formyltransferase                                                                              | Gart          |
| Q8K1N2     | pleckstrin homology like domain, family B, member 2                                                                      | Phldb2        |
| B2RXS4     | plexin B2                                                                                                                | Plexb2        |
| P59470     | polymerase (RNA) III (DNA directed) polypeptide B                                                                        | Polr3b        |
| Q3UZD5     | PR domain containing 6                                                                                                   | Prdm6         |
| Q3V0P3     | predicted gene 1527                                                                                                      | Gm1527        |
| Q58EV5     | predicted gene, 21596                                                                                                    | Gm21596       |
| P70268     | protein kinase N1                                                                                                        | Pkn1          |
| B2RXQ2     | protein tyrosine phosphatase, receptor type, f polypeptide (PTPRF), interacting protein (liprin), alpha 1                | Ppfla1        |
| Q3TM21     | pyrroline-5-carboxylate reductase family, member 2                                                                       | Pycr2         |
| Q9DCC4     | pyrroline-5-carboxylate reductase-like                                                                                   | Pycrl         |
| Q35551     | rabaptin, RAB GTPase binding effector protein 1                                                                          | Rabep1        |
| Q3UYI5     | rai guanine nucleotide dissociation stimulator-like 3                                                                    | Rgl3          |
| E9PW37     | RAS protein activator like 2                                                                                             | Rasal2        |
| Q5SWN2     | replication protein A1                                                                                                   | Rpa1          |
| Q99P72     | reticulin 4                                                                                                              | Rtn4          |
| Q9EP71     | retinoic acid induced 14                                                                                                 | Rai14         |
| E9PUF7     | Rho guanine nucleotide exchange factor (GEF) 1                                                                           | Arhgef1       |
| Q8C033     | Rho guanine nucleotide exchange factor (GEF) 10                                                                          | Arhgef10      |
| F8VQN6     | Rho guanine nucleotide exchange factor (GEF) 12                                                                          | Arhgef12      |
| Q91VI7     | ribonuclease/angiogenin inhibitor 1                                                                                      | Rnh1          |
| P62918     | ribosomal protein L8                                                                                                     | Rpl8          |
| P62855     | ribosomal protein S26                                                                                                    | Rps26         |
| A0A087WRF9 | RIKEN cDNA 1700088E04 gene                                                                                               | 1700088E04Rik |
| E9QM90     | RIKEN cDNA 2310035C23 gene                                                                                               | 2310035C23Rik |
| G3X8V5     | ring finger protein 219                                                                                                  | Rnf219        |
| F8WJE0     | SAM domain and HD domain, 1                                                                                              | Samhd1        |
| Q9EQC5     | SCY1-like 1 (S. cerevisiae)                                                                                              | Scyl1         |
| A2AIX1     | SEC16 homolog A, endoplasmic reticulum export factor                                                                     | Sec16a        |
| M9MMK0     | sema domain, immunoglobulin domain (Ig), short basic domain, secreted, (semaphorin) 3B                                   | Sema3b        |
| Q543J5     | serine (or cysteine) peptidase inhibitor, clade C (antithrombin), member 1                                               | Serpinc1      |
| Q9J111     | serine/threonine kinase 4                                                                                                | Stk4          |
| Q6ZPE2     | SET binding factor 1                                                                                                     | Sbf1          |
| Q3TRJ7     | SH3-domain GRB2-like 1                                                                                                   | Sh3gl1        |
| P56873     | Sjogren's syndrome/scleroderma autoantigen 1 homolog (human)                                                             | Sssca1        |
| F8VPQ4     | SLIT-ROBO Rho GTPase activating protein 3                                                                                | Srgap3        |
| Q6P5D8     | SMC hinge domain containing 1                                                                                            | Smchd1        |
| Q80UJ1     | solute carrier family 22 (organic anion transporter), member 20                                                          | Sic22a20      |
| Q58A65     | sperm associated antigen 9                                                                                               | Spag9         |
| Q8VIJ6     | splicing factor proline/glutamine rich (polypyrimidine tract binding protein associated)                                 | Sfpq          |
| O54988     | STE20-like kinase                                                                                                        | Sik           |
| P58871     | tankyrase 1 binding protein 1                                                                                            | Tnks1bp1      |
| Q9D2E2     | target of EGR1, member 1 (nuclear)                                                                                       | Toe1          |
| Q3URV1     | TBC1 domain family, member 32                                                                                            | Tbc1d32       |
| Q05895     | thrombospondin 3                                                                                                         | Thbs3         |
| A2ASS6     | titin                                                                                                                    | Ttn           |
| Q52L67     | trans-2,3-enoyl-CoA reductase                                                                                            | Tecr          |
| Q62351     | transferrin receptor                                                                                                     | Tfrc          |
| P37804     | transgelin                                                                                                               | Tagln         |
| Q3UBX0     | transmembrane protein 109                                                                                                | Tmem109       |
| Q80WC3     | trinucleotide repeat containing 18                                                                                       | Tnrc18        |
| Q9Z1A1     | Trk-fused gene                                                                                                           | Tfg           |
| Q6F4J0     | tubulin, gamma 2                                                                                                         | Tubg2         |
| Q9ES34     | ubiquitin protein ligase E3B                                                                                             | Ube3b         |
| F6WJB7     | ubiquitin specific peptidase 34                                                                                          | Usp34         |
| F8VPU6     | ubiquitin specific peptidase 9, Y chromosome                                                                             | Usp9y         |
| Q9CR26     | vesicle (multivesicular body) trafficking 1                                                                              | Vta1          |
| E9Q743     | WD repeat domain 66                                                                                                      | Wdr66         |
| Q6NXJ0     | WW, C2 and coiled-coil domain containing 2                                                                               | Wwc2          |
| Q9JKB3     | Y box protein 3                                                                                                          | Ybx3          |

Suppl Fig 1

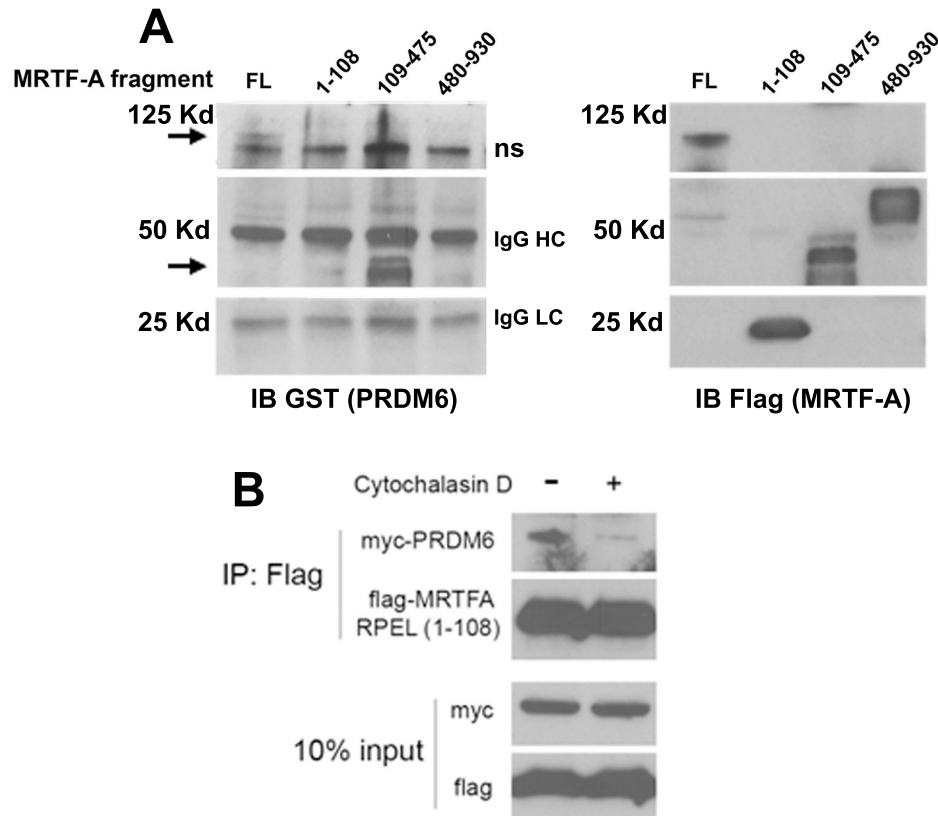

Supplemental Figure 1. Prdm6 interacted directly with MRTF-A. A) The indicated Flag-MRTF-A fragments were expressed in Cos-7 cells, purified by immunoprecipitation, run on an SDS page gel, and transferred to nitrocellulose. Following renaturation, blots were incubated with GST-Prdm6, washed, and then probed with an anti-GST Ab. Arrows mark interactions between PRDM6 and full length and 109-475 MRTF-A variants. n=2, representative blot shown. B) A flag-tagged N-terminal fragment of MRTFA (AA1-108) and full length myc-Prdm6 were expressed in COS cells. The MRTF-A N-terminal fragment was immunoprecipitated in the presence and absence of the actin binding drug cytochalasin, and washed immunoprecipitates were probed for myc. n=2, representative blot shown.

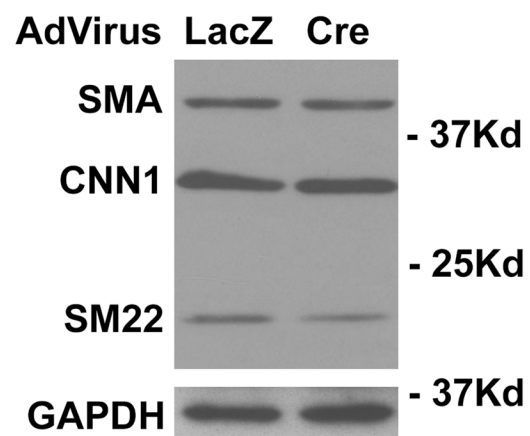

Supplemental Figure 2. PRDM6 depletion inhibited SMC marker protein expression. Outflow tract SMCs isolated from *Prdm6* flox/flox mice were treated with Cre or LacZ expressing virus. RIPA lysates were run on a 10% SDS page gel, transferred to nitrocellulose, and then probed for the indicated SMC marker. n=2, representative blot shown.

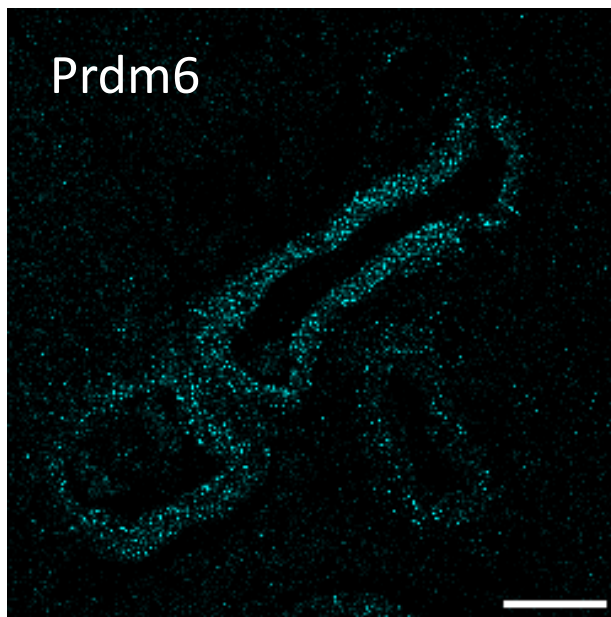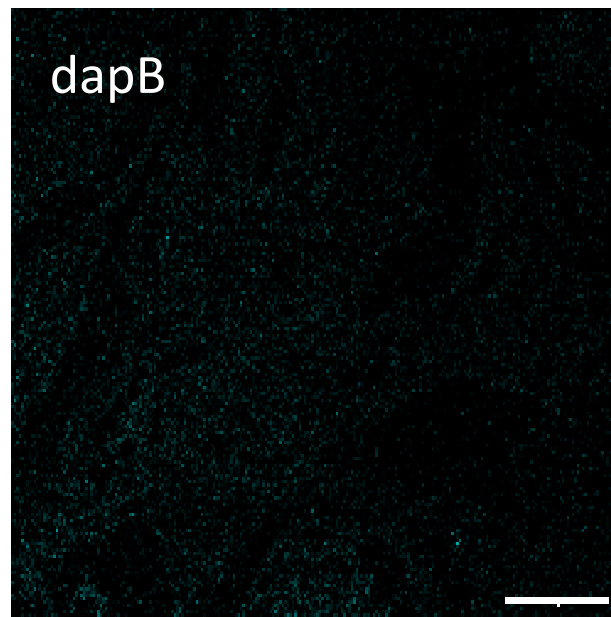

**Supplemental Figure 3.** Formalin fixed, paraffin embedded sections through the ductus arteriosus from E18.5 mice were processed for RNAscope-based in situ hybridization using probes specific to Prdm6 (left) or the bacterial gene, dapB (right). Scale bar = 200 microns

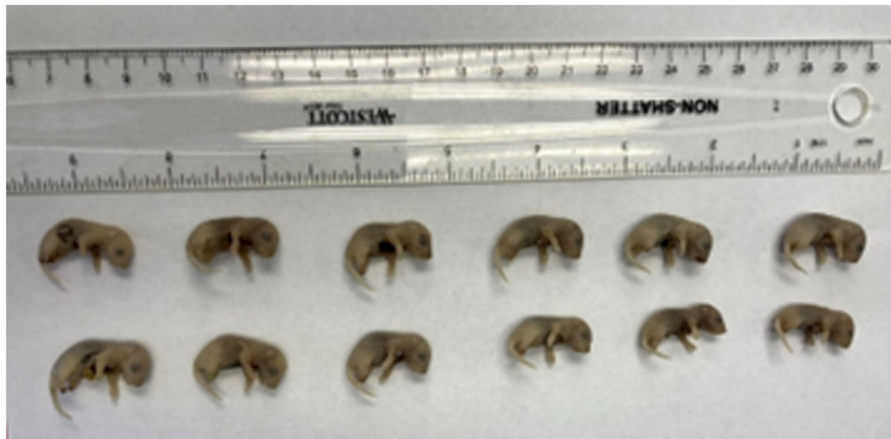

Supplemental Figure 4. Neural crest cell-specific deletion of *Prdm6* did not affect the overall size or general appearance of P1 mouse pups. *Wnt1Cre2PRDM6* flox/flox P1 pups (top) and littermate control P1 pups (bottom) from crosses between male and female *Wnt1Cre2PRDM6* Wt/flox mice. Note that the littermate control group consists of the following genotypes - *Wnt1Cre2PRDM6* Wt/flox, *Wnt1Cre2PRDM6* Wt/Wt, *PRDM6* flox/flox, *PRDM6* Wt/flox, and *PRDM6* Wt/Wt.

LacZ/CD31

SMA/CD31

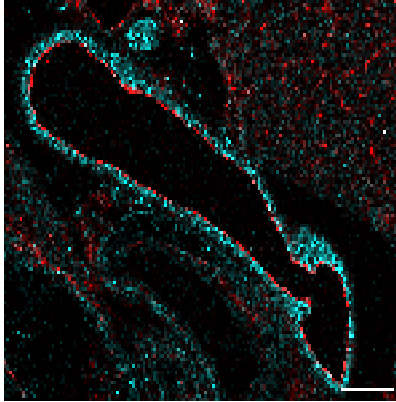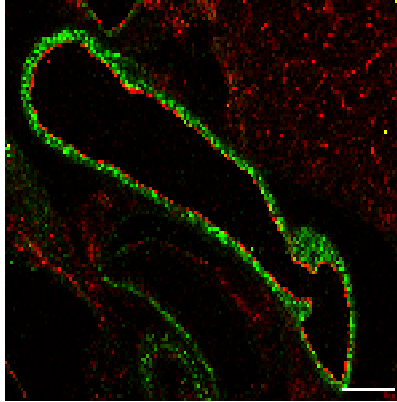

Secondary Abs only

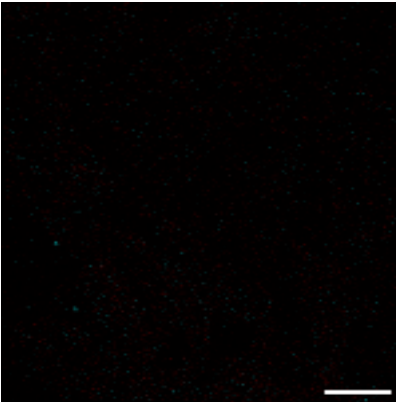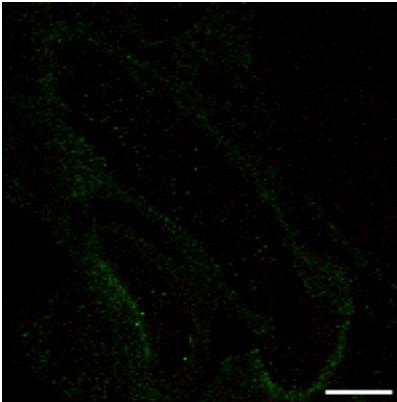

Supplemental Figure 5. Strong overlap between LacZ and SM  $\alpha$ -actin expression in outflow tract SMC of Wnt1Cre2ROSA26LacZ mice. Formalin fixed, paraffin embedded sections through the aortic arch of Wnt1Cre2ROSA26LacZ P1 mice were stained with anti-LacZ, anti-SM  $\alpha$ -actin (SMA), and anti-CD31 Abs. Note the strong overlap between LacZ and SM  $\alpha$ -actin expression and that we observed little to no background staining with secondary Abs alone.

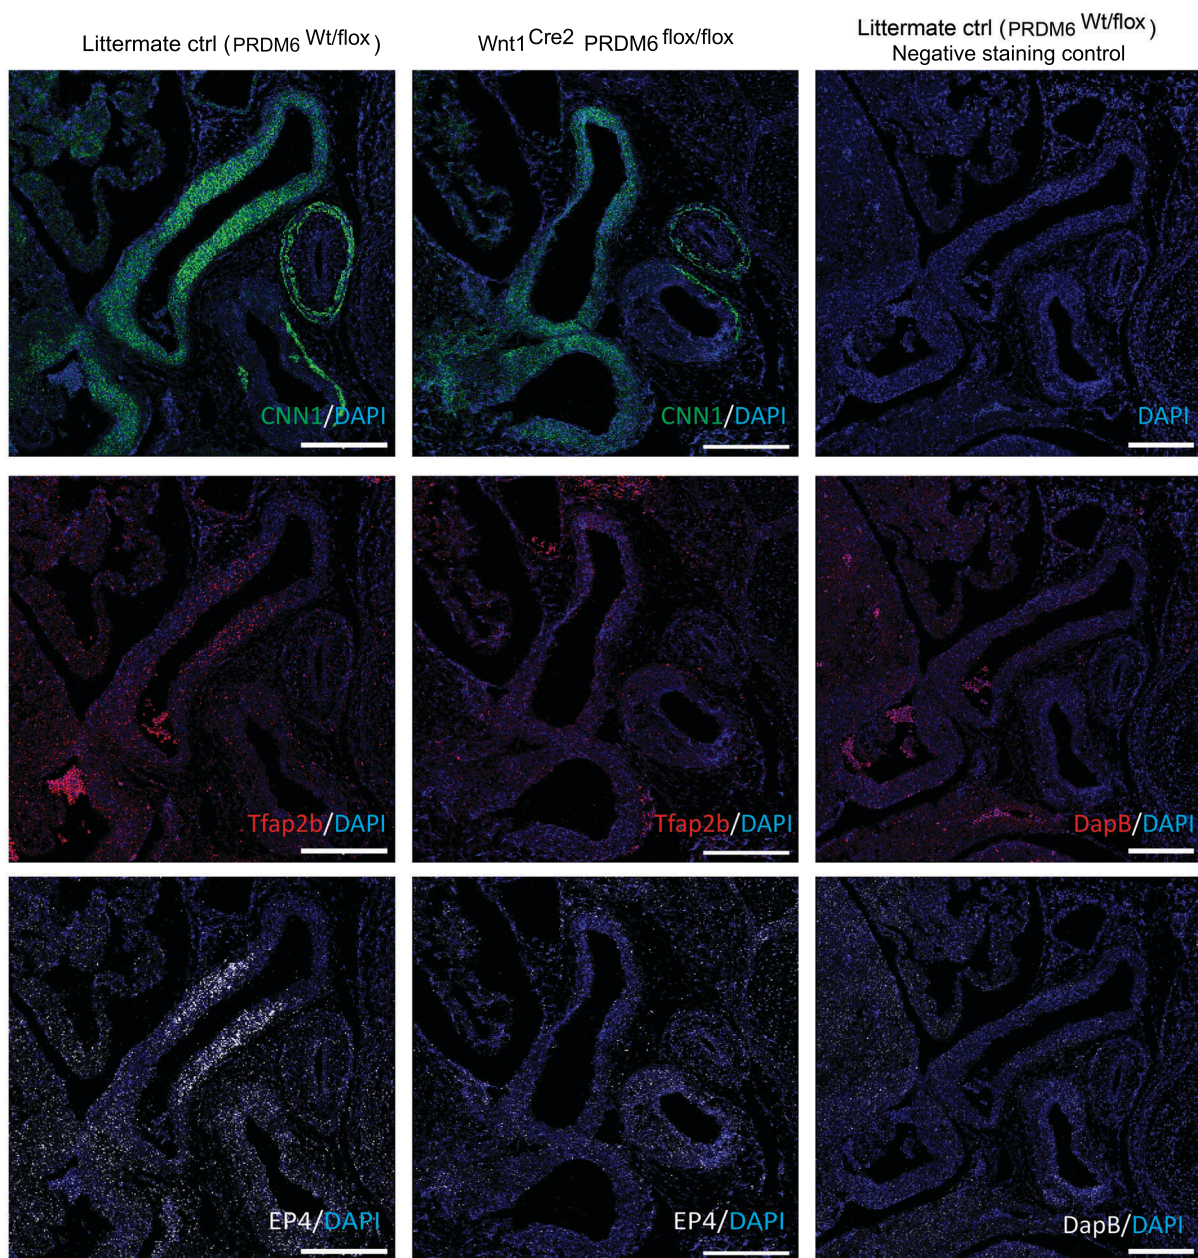

Supplemental Figure 6. PRDM6 depletion in neural crest-derived SMC inhibited the expression of EP4, Tfap2b, and CNN1. Formalin fixed, paraffin embedded sections through the ductus arteriosus of Wnt1Cre2Prdm6<sup>flox/flox</sup> and littermate control mice at E18.5 were processed for immunofluorescence-based detection of CNN1 (top), RNAscope-based detection of Tfap2B (middle), or RNAscope-based detection of EP4 expression (bottom). Note the lack of staining with secondary Ab only or with the use of an RNAscope in situ probe against the bacterial protein dapB (right column).

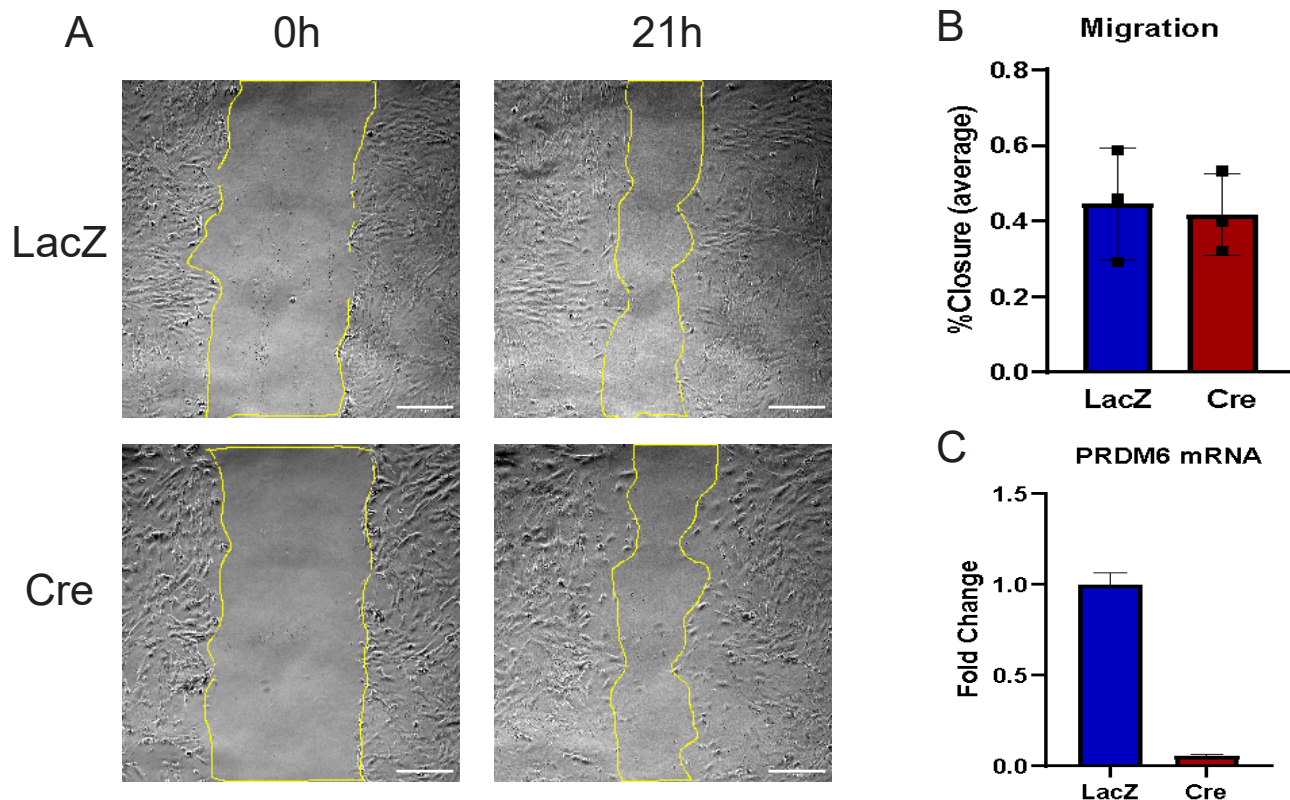

Supplemental Figure 7. PRDM6 depletion did not affect migration of cultured outflow tract SMCs. A) Outflow tract SMCs isolated from *Prdm6* flox/flox mice were treated with Cre or LacZ expressing virus, grown to confluence, and then subjected to scratch wounding as shown. B) Wound closure at 21 h was quantified by averaging wound diameter measurements taken from 10 different locations. n=3. C) *Prdm6* expression in Cre- and LacZ-infected cells was measured by qPCR.
